# Supplementary material for: Aptamers in Non-Small Cell Lung Cancer Treatment
Source: MDPI journal article supplement (doi:10.3390/molecules25143138), 2020-07-09
Supplement: s1 [file s1]

# Aptamers in Non-Small Cell Lung Cancer Treatment

Irena Wieleba \*, Kamila Wojas-Krawczyk and Paweł Krawczyk

Department of Pneumology, Oncology and Allergology, Medical University of Lublin, 20-090 Lublin, Poland; kamilawojas@wp.pl (K.W.-K.); krapa@poczta.onet.pl (P.K.)

\* Correspondence: i.m.wieleba@gmail.com

Received: 5 June 2020; Accepted: 8 July 2020; Published: date

**Abstract:** Aptamers are short, single-stranded oligonucleotides which are capable of specifically binding to single molecules and cellular structures. Aptamers are also known as “chemical antibodies”. Compared to monoclonal antibodies, they are characterized by higher reaction specificity, lower molecular weight, lower production costs, and lower variability in the production stage. Aptamer research has been extended during the past twenty years, but only Macugen® has been accepted by the Food and Drug Administration (FDA) to date, and few aptamers have been examined in clinical trials. In vitro studies with aptamers have shown that they may take part in the regulation of cancer progression, angiogenesis, and metastasis processes. In this article, we focus on the potential use of aptamers in non-small cell lung cancer treatment.

**Keywords:** aptamers; NSCLC; cancer

**Table 1.** Clinical trials with selected aptamers mentioned in this article (I – first phase clinical trial, II – second phase clinical trial, III – third phase clinical trial, (-) – no data).

| Aptamer's name    | Molecular targets | Diseases                              | Clinical trials                                                                                    |
|-------------------|-------------------|---------------------------------------|----------------------------------------------------------------------------------------------------|
| Pegaptanib        | VEGF              | AMD<br>Diabetic Macular Oedema<br>PDR | NCT00321997 (II, III)<br>NCT00312351 (IV)<br>NCT00040313 (II)<br>NCT01487044(-)<br>NCT01487070 (I) |
| E10030            | PDGF              | AMD                                   | NCT01089517 (II)<br>NCT00569140 (I)<br>NCT01944839 (III)<br>NCT01940900 (III)<br>NCT01940887 (III) |
| ARC 126<br>AX 102 |                   | AMD<br>AMD                            | pre-clinical phase<br>pre-clinical phase                                                           |

|                                                    |                |                                                                                 |                                    |
|----------------------------------------------------|----------------|---------------------------------------------------------------------------------|------------------------------------|
| NOX-A12                                            | SDF-1          | Autologous Stem Cell Transplantation<br>Hematopoietic Stem Cell Transplantation | NCT00976378 (I)<br>NCT01194934 (I) |
| AS1411                                             | nucleolin      | Acute Myeloid Leukemia                                                          | NCT01034410 (II)                   |
| E0727/CL428/KD1130/TuTu223<br>A1532/4233/CL434/CL4 | EGFR           | Solid tumors                                                                    | pre-clinical phase                 |
| NAS-24                                             | Vimentin       | Solid tumors                                                                    | pre-clinical phase                 |
| OPN-R3                                             | Osteopontin    | Bone metastases                                                                 | pre-clinical phase                 |
| A-P50                                              | NF- $\kappa$ B | Solid tumors                                                                    | pre-clinical phase                 |
| Apt-PD-L1                                          | PD-L1          | Solid tumors                                                                    | pre-clinical phase                 |
| Anti-CTLA4                                         | CTLA4          | Solid tumors                                                                    | pre-clinical phase                 |
